# Supplementary material for: Experimental and theoretical evidence for temperature driving an electric-magnetic complementary effect in magnetic microwave absorbing materials
Source: Royal Society of Chemistry journal article supplement (doi:10.1039/c9tc06551b), 2020-01-01
Supplement: c9tc06551b1.pdf [file c9tc06551b1.pdf]

## **Supporting Information**

# **Experimental and theoretical evidence for temperature driving electric-magnetic complementary effect in magnetic microwave absorbing materials**

*Xuan Yang, Yuping Duan\*, Yuansong Zeng, Huifang Pang\*, Guojia Ma,  
Xuhao Dai*

## Supporting Figures

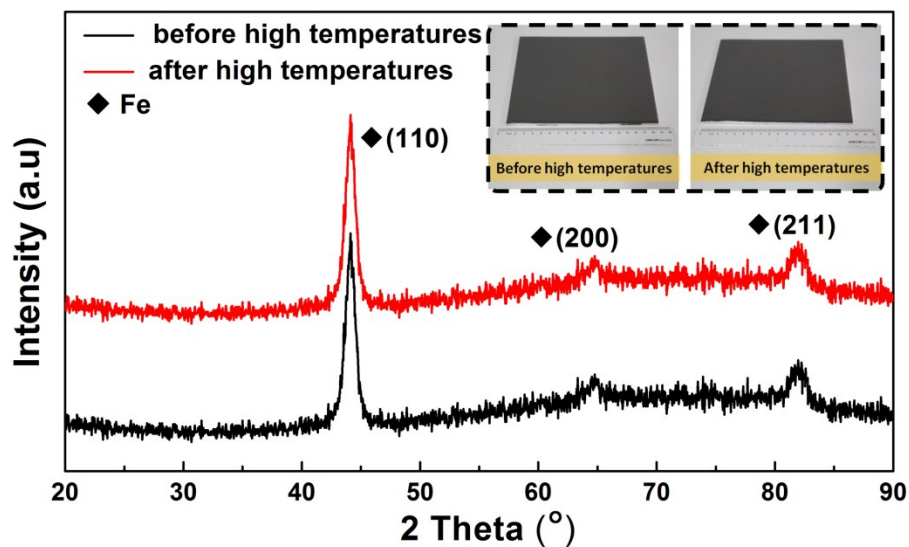

Supporting Figure 1 XRD pattern of coating before and after high temperatures. The coating surface was smooth and dense without significant change before and after high temperatures. The diffraction patterns of coating have little change before and after high temperatures. The characteristic peaks appear at  $44.35^\circ$ ,  $64.52^\circ$  and  $81.65^\circ$ , which are assigned to (110), (200) and (211) crystal planes of iron respectively. These similar diffraction patterns indicates that there is no oxidation of CIPs during the high temperatures test.

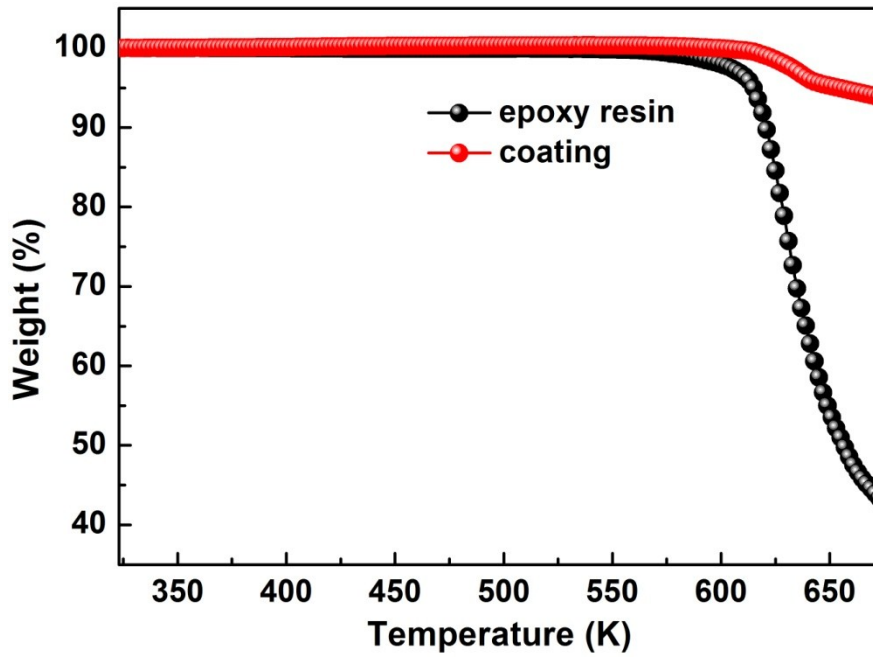

Supporting Figure 2 TGA analysis of epoxy resin and coating.

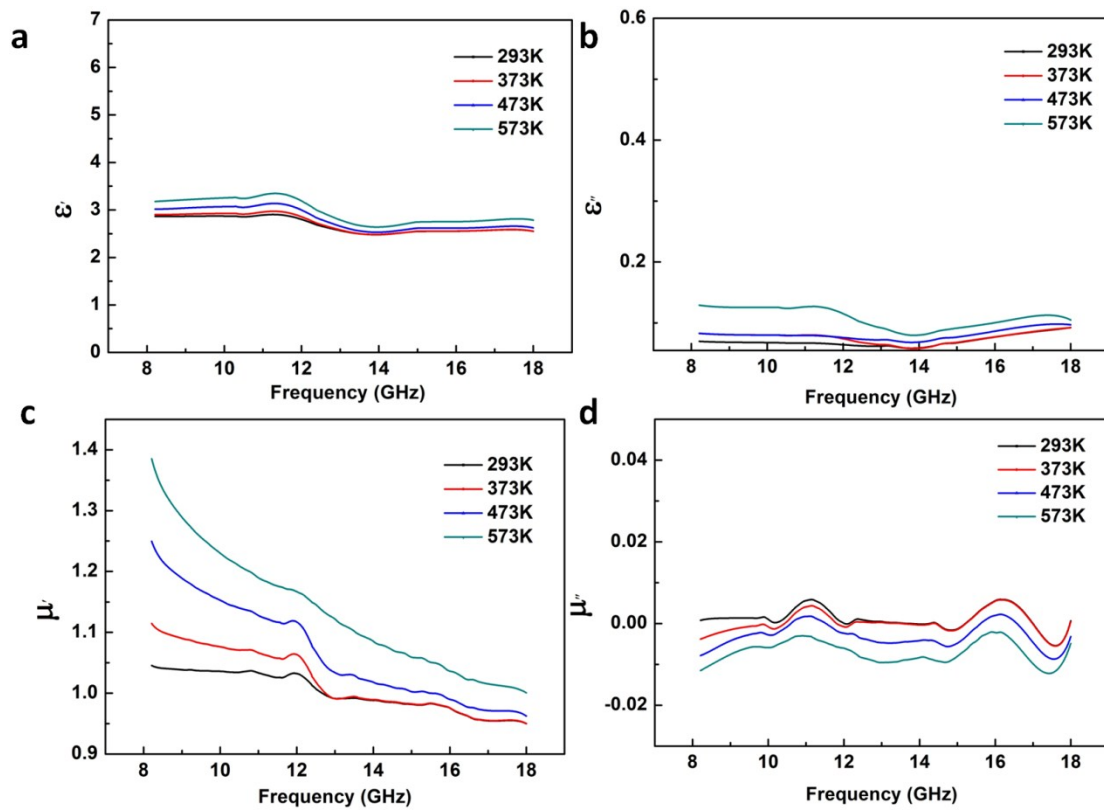

Supporting Figure 3 Frequency dependence of electromagnetic parameters of epoxy resin at different temperatures. (a) The real part of complex permittivity. (b) The imaginary part of complex

permittivity. (c) The real part of complex permeability. (d) The imaginary part of complex permeability.

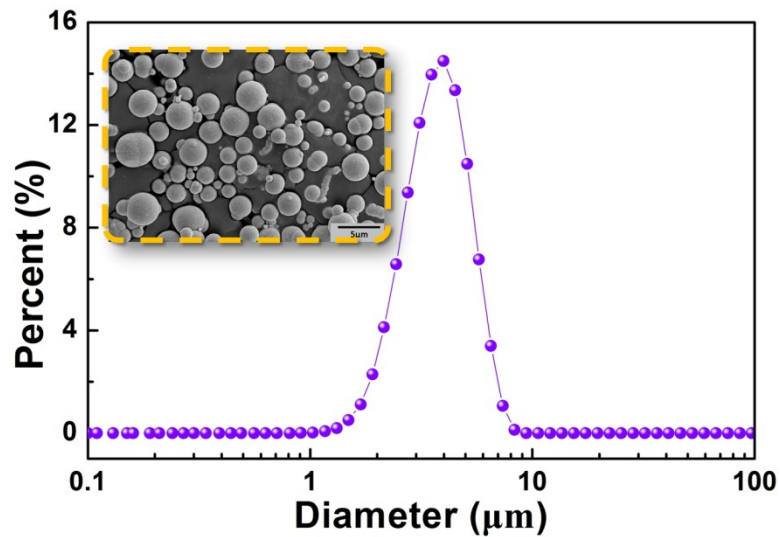

Supporting Figure 4 Size distribution of CIPs. The particle size test results are consistent with the observations of SEM, and the CIPs size distribution is relatively concentrated from 0.91  $\mu\text{m}$  to 8.32  $\mu\text{m}$ .

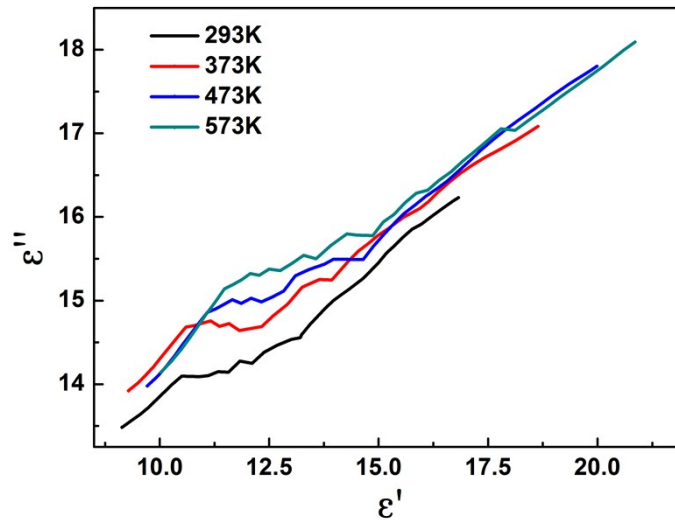

Supporting Figure 5 Cole-Cole plots at different temperatures. C-C semicircles are the important symbols of polarization relaxation, and one semicircle represents one pattern of polarization relaxation. If the plot is close to a straight line, the polarization relaxation is very weak in this system. Therefore, these plots are close to straight lines at different temperatures indicate that the polarization relaxation loss can be ignored in the coating.

## Supporting Equations

$$\mu_i - 1 = \frac{4\pi}{\frac{H_k}{M_s} + 4\pi N_h} \quad (1)$$

where  $H_k$  is the magnetocrystalline anisotropy field;  $N_h$  is the demagnetization factor;  $M_s$  is the saturation magnetization of CIPs. In our case, due to the use of spherical CIPs, there is no significant anisotropy, and the particle size as well as crystal structure do not change obviously during the entire heating process. Hence,  $H_k$  and  $N_h$  are not the main factor causing the change in  $\mu_i$ .

$$f = 2\pi\omega \quad (2)$$

$$\frac{\omega}{\gamma} = \frac{Q\mu_{kn}^2}{r^2 M_s} + H \quad (3)$$

$$H = H_0 - \frac{4\pi M_s}{3} + \frac{2k}{M_s} = H_0 - \frac{2M_s}{3} \left( 2\pi - \frac{\mu_0}{\mu_i} \right) \quad (4)$$

where  $f$  is the frequency,  $\omega$  is angular frequency,  $\gamma$  is gyromagnetic ratio,  $Q$  is exchange constant,  $H$  is magnetic field,  $\mu_{kn}$  is root of spherical Bessel function,  $r$  is particle size,  $\mu_i$  is initial susceptibility,  $\mu_0$  is vacuum permeability, and  $H_0$  is applied field. In the above three formulas, all parameters except  $M_s$ ,  $\omega$ ,  $f$ ,  $\mu_i$  and  $H$  are constant.

Therefore, there is a corresponding relationship between  $M_s$  and exchange resonance frequency.<sup>[1]</sup>

$$C_0 = \mu'' (\mu')^{-2} f^{-1} = \frac{2\pi\sigma\mu_0 d^2}{3} \quad (5)$$

where  $C_0$  is the eddy current coefficient,  $\sigma$  is the conductivity,  $d$  is thickness of the region that generates the eddy current. The parameters on the right side of the Supplementary Equation 5 are constant at the same temperature, so  $C_0$  is constant when there is only eddy current loss.<sup>[2]</sup>

$$\varepsilon'(T) = \varepsilon_\infty + \frac{\varepsilon_s - \varepsilon_\infty}{1 + \omega^2 \tau(T)^2} \quad (6)$$

$$\tau(T) = \tau_0 e^{\frac{E_d}{RT}} \quad (7)$$

where  $\tau(T)$ ,  $\varepsilon_s$ ,  $\varepsilon_\infty$ ,  $\omega$ ,  $T$ ,  $\tau_0$  and  $E_d$  are the temperature-dependent relaxation time, static dielectric constant, dielectric constant at infinite frequency, angular frequency, temperature, prefactor and activation energy, respectively.

## Supporting Note 1: Simulation of conductivity and current density distribution at MIM junction

Due to the curing nature of epoxy resin, it is difficult to prepare cross-sectional samples for the precise characterization of the metal-insulator-metal junctions thickness using transmission electron microscopy. However, it can be estimated theoretically via the numerical calculations. In general, the insulating barrier layer in the MIM junction is modeled as rectangular barrier or trapezoidal barrier.<sup>[3]</sup> For our case, the fluctuating voltage generated by the temperature change causes a barrier height difference across the insulating layer, so the insulating barrier layer is more suitable for modeling into the trapezoidal barrier. Based on the one-dimensional trapezoidal tunnel barrier model (Figure 5e), we define that electrons with mass  $m$  and energy  $E$  are projected to the trapezoidal barrier along the positive x-axis. The barrier function of trapezoidal barrier can be expressed by following equation:

$$U(x) = U_0 - \frac{x}{d}V_T \quad (8)$$

where  $U_0$  is the initial barrier height,  $d$  is the tunneling spacing between two CIPs,  $V_T$  is the fluctuating voltage. When a large number of electrons are incident into a trapezoidal barrier, only electrons



whose wave function satisfies the corresponding stationary Schrödinger equation  $\psi$  can complete tunneling and other electrons will be reflected to other directions. Here, the Wentzel-Kramers-Brillouin (WKB) approximation method<sup>[4]</sup> is used to solve  $\psi$ , as follows:

$$\begin{cases} \frac{d^2 \psi}{dx^2} + \frac{2m}{\hbar^2} E \psi = 0 & x < 0, x > d \\ \frac{d^2 \psi}{dx^2} + \frac{2m}{\hbar^2} [E - U(x)] \psi = 0 & 0 < x < d \end{cases} \quad (9)$$

where  $\hbar$  is the Planck constant. We pay more attention to the tunneling coefficient  $t$  throughout the solution process, which indicates the probability of electrons completing tunneling. Specifically, depending on the electrons energy and average height of barrier, the calculation of  $t$  can be divided into the following three parts.<sup>[5]</sup>

$$\begin{cases} t = \frac{4K_1^2 \bar{K}_2^2}{(K_1^2 - \bar{K}_2^2)^2 \sin^2 d\bar{K}_2 + 4K_1^2 \bar{K}_2^2} & E > \bar{U} \\ t = \frac{1}{1 + 0.25d^2 K_1^2} & E = \bar{U} \\ t = \frac{4K_1^2 \bar{K}_3^2}{(K_1^2 - \bar{K}_3^2)^2 \text{sh}^2 d\bar{K}_2 + 4K_1^2 \bar{K}_3^2} & E < \bar{U} \end{cases} \quad (10)$$

$$\left\{ \begin{array}{l} U = \frac{\int_0^d U(x) dx}{d} \\ K_1 = \left[ \frac{2mE}{\hbar^2} \right]^{\frac{1}{2}} \\ \bar{K}_2 = \frac{\int_0^d \sqrt{2m[U(x) - E]} dx}{\hbar d} \\ \bar{K}_2 = i\bar{K}_3 \end{array} \right. \quad (11)$$

In our case, the change in temperature not only affects the magnitude of fluctuating voltage, but also affects the energy distribution of electrons. Therefore, combining these two aspects, the tunneling current,  $I(V_T)$ , at different temperatures can be described by the following equation:

$$I(V_T) = \frac{2\pi e}{h} \int_0^{E_f} t(E, V_T) [f(E) - f(E + V_T)] dE \quad (12)$$

where  $E_f$  is the Fermi level,  $h$  is the reduced Planck constant,  $e$  is the elementary charge ( $1.6 \times 10^{-19}$  C). Moreover,  $f(E)$  is the Fermi-Dirac distribution described by equation (13):

$$f(E) = \left\{ 1 + \exp \left[ \frac{(E - E_f)}{Tk_B} \right] \right\}^{-1} \quad (13)$$

where  $k_B$  is the Boltzmann constant ( $1.38 \times 10^{-23}$  J/K). On the other hand, due to the randomness of the thermal motion of electrons, the probability of voltage fluctuations is another key factor affecting the conductivity of MIM junctions. Hence, the probability of voltage fluctuations at different temperatures should be included in the calculation to further improve the accuracy. The specific calculation formula is as follows:

$$P(V_T) = \left(\frac{2C}{\pi T k_B}\right)^{\frac{1}{2}} \exp\left(-\frac{C}{2T k_B} V_T^2\right) \quad (14)$$

where  $C$  represents the equivalent capacitor with area  $S$  ( $0.5 \times 10^{-18} \text{m}^2$ ). Based on the above derivation, the conductivity expressions (Supplementary Equation 15) of MIM junctions controlled by tunneling effect at different temperatures and corresponding current density distribution (Supplementary Equation 16) can be obtained.

$$\sigma = \int_0^{\infty} P(V_T) \frac{dI(V_T)}{dV_T} dV_T \quad (15)$$

$$j = \frac{I(V_T)}{S} \quad (16)$$

In the calculation of the tunneling current through the MIM junctions, the thickness of the insulating layer is adjusted and the

correct value is ascertained by matching the magnitude of the calculated conductivity curve to the experimentally measured one. The thickness of the insulating layer is found to be  $\sim 4.67$  nm.

## Supporting Note 2: Calculation of conductivity generated by thermal electron emission at MIM junction

It is possible for electrons with energy exceeding the barrier to complete electron emission and the electron energy distribution is closely related to the temperature. Therefore, the temperature has an important influence on the thermal electron current. The current density generated by thermal electron emission at different temperatures can be calculated by following Richardson Dushman equation:<sup>[6]</sup>

$$I_0 = AT^2 e^{\left(-\frac{\phi}{kT}\right)} \quad (17)$$

where  $I_0$  is the zero-field emission density,  $T$  is the temperature,  $A$  is the emission constant ( $120 \text{ Acm}^{-2}\text{K}^{-2}$ ),  $k$  is the Boltzmann constant ( $8.62 \times 10^{-5} \text{ eV/K}$ ),  $\phi$  is the work function (4.5 eV for iron). The calculation results are shown in Table 1, and it is clear that the current density generated by thermionic emission is significantly less than that of tunneling effect. For CIPs at the temperature range of 293 K-573 K, although the increase in temperature enhances the energy of electrons, only a very small amount of electrons have higher energy than barrier, completing thermal electron emission. By contrast, the

energy of electrons participating in the tunneling effect is not necessarily exceeding the barrier, and an increase in temperature can effectively boosts the fluctuation voltage to adjust barrier shape, further improving the probability of tunneling effect. Therefore, tunneling effect is the main mechanism for controlling electrons transfer in temperature range 293 K- 573 K.

Table 1 Current density of thermal electron emission for MIM junctions at different temperatures.

| Temperature (K)                      | 293 K                                       | 373 K                                       | 473 K                                       | 573 K                                       |
|--------------------------------------|---------------------------------------------|---------------------------------------------|---------------------------------------------|---------------------------------------------|
| Current density (A/cm <sup>2</sup> ) | $1.47 \times 10^{-73}$<br>A/cm <sup>2</sup> | $7.38 \times 10^{-57}$<br>A/cm <sup>2</sup> | $6.63 \times 10^{-44}$<br>A/cm <sup>2</sup> | $1.86 \times 10^{-35}$<br>A/cm <sup>2</sup> |

## References

- [1] a) J. Ramprecht, D. Sjöberg, *Journal of Physics D: Applied Physics* **2008**, 41, 135005; b) F. Wen, H. Yi, L. Qiao, H. Zheng, D. Zhou, F. Li, *Applied Physics Letters* **2008**, 92, 1032.
- [2] P. Yang, Y. Liu, X. Zhao, J. Cheng, H. Li, *Advanced Powder Technology* **2016**, 27, 1128.
- [3] P. Wang, A. V. Krasavin, M. E. Nasir, W. Dickson, A. V. Zayats, *Nature Nanotechnology* **2018**, 13, 159.
- [4] a) J. W. Conley, C. B. Duke, G. D. Mahan, J. J. Tiemann, *Physical Review* **1968**, 150, 466; b) N. Jalili, *Piezoelectric-Based Micro- and Nano-Positioning Systems*, **2010**.
- [5] E. Burstein, S. Lundqvist, *Tunneling Phenomena in Solids*, **1969**.
- [6] a) A. L. Smith, R. Breitwieser, *Journal of Applied Physics* **1970**, 41, 436; b) S. Elfimchev, M. Chandran, R. Akhvlediani, A. Hoffman, *Applied Surface Science* **2017**, 410, 414.
